# Supplementary material for: Association of Deferred vs Immediate Cord Clamping With Severe Neurological Injury and Survival in Extremely Low-Gestational-Age Neonates
Source: PubMed Central journal article supplement (PMC6450317; doi:10.1001/jamanetworkopen.2019.1286), 2019-03-29
Supplement: jamanetwopen-2-e191286-s001.pdf [file jamanetwopen-2-e191286-s001.pdf]

## Supplementary Online Content

Lodha A, Shah PS, Soraisham AS, Rabi Y, Abou Mehren A, Singhal N; Canadian Neonatal Network Investigators. Association of deferred vs immediate cord clamping with severe neurological injury and survival in extremely low-gestational-age neonates. *JAMA Netw Open*. 2019;2(3):e191286. doi:10/1001/jamanetworkopen.2019.1286

**eTable 1.** Population and Deferred Cord Clamping Rates by Site

**eTable 2.** Maternal and Neonatal Characteristics of Neonates Excluded Because of Absence of Cord Clamping Information

This supplementary material has been provided by the authors to give readers additional information about their work.

**eTable 1.** Population and Deferred Cord Clamping Rates by Site

| <b>Site*</b> | <b>Number of eligible preterm neonates</b> | <b>Deferred cord clamping rate (%)</b> |
|--------------|--------------------------------------------|----------------------------------------|
| <b>A</b>     | 255                                        | 24.31                                  |
| <b>B</b>     | 231                                        | 73.16                                  |
| <b>C</b>     | 91                                         | 10.99                                  |
| <b>D</b>     | 29                                         | 37.93                                  |
| <b>E</b>     | 518                                        | 63.71                                  |
| <b>F</b>     | 143                                        | 79.02                                  |
| <b>G</b>     | 81                                         | 76.54                                  |
| <b>H</b>     | 323                                        | 26.63                                  |
| <b>I</b>     | 131                                        | 58.78                                  |
| <b>J</b>     | 341                                        | 0.29                                   |
| <b>K</b>     | 111                                        | 4.5                                    |
| <b>L</b>     | 80                                         | 55                                     |
| <b>M</b>     | 263                                        | 0                                      |
| <b>N</b>     | 16                                         | 25                                     |
| <b>O</b>     | 639                                        | 47.4                                   |
| <b>P</b>     | 295                                        | 58.06                                  |
| <b>Q</b>     | 139                                        | 0                                      |
| <b>R</b>     | 89                                         | 17.27                                  |
| <b>S</b>     | 78                                         | 59.55                                  |
| <b>T</b>     | 43                                         | 7.69                                   |
| <b>U</b>     | 112                                        | 30.23                                  |
| <b>V</b>     | 37                                         | 66.96                                  |
| <b>W</b>     | 154                                        | 47.4                                   |
| <b>X</b>     | 14                                         | 7.14                                   |
| <b>Y</b>     | 432                                        | 56.25                                  |
| <b>Z</b>     | 31                                         | 12.9                                   |

\*Per Canadian Neonatal Network policy, site names are represented by anonymized letters.

**eTable 2.** Maternal and Neonatal Characteristics of Neonates Excluded Because of Absence of Cord Clamping Information

| Characteristics                                                                                  | Included neonates<br>(n=4680) | Excluded neonates <sup>a</sup><br>(n=1890) | P value <sup>b</sup> |
|--------------------------------------------------------------------------------------------------|-------------------------------|--------------------------------------------|----------------------|
| <b>Maternal Characteristics</b>                                                                  |                               |                                            |                      |
| Maternal hypertension, n (%)                                                                     | 731 (15.8)                    | 337 (18.2)                                 | .018                 |
| Antenatal steroid, n (%)                                                                         | 4340 (93.5)                   | 1692 (91.6)                                | .007                 |
| Cesarean section, n (%)                                                                          | 2721 (58.2)                   | 1122 (59.8)                                | .239                 |
| <b>Neonatal Characteristics</b>                                                                  |                               |                                            |                      |
| GA, median (IQR)                                                                                 | 26 (25, 27)                   | 26 (25, 28)                                | .004                 |
| GA group, n (%)                                                                                  |                               |                                            |                      |
| 23                                                                                               | 287 (6.1)                     | 104 (5.5)                                  | .082                 |
| 24                                                                                               | 581 (12.4)                    | 207 (10.9)                                 |                      |
| 25                                                                                               | 746 (15.9)                    | 293 (15.5)                                 |                      |
| 26                                                                                               | 901 (19.3)                    | 349 (18.5)                                 |                      |
| 27                                                                                               | 1000 (21.4)                   | 403 (21.3)                                 |                      |
| 28                                                                                               | 1165 (24.9)                   | 534 (28.3)                                 |                      |
| Birth weight, median (IQR)                                                                       | 890 (720, 1090)               | 890 (720, 1090)                            | .863                 |
| Birth weight group, n (%)                                                                        |                               |                                            |                      |
| <1000 grams                                                                                      | 3056 (65.3)                   | 1236 (65.4)                                | 0.940                |
| >1000 grams                                                                                      | 1624 (34.7)                   | 654 (34.6)                                 |                      |
| Apgar score at 5 min <7, n (%)                                                                   | 1993 (42.7)                   | 789 (42.1)                                 | .637                 |
| SNAP-II score, median (IQR)                                                                      | 14 (9, 22)                    | 14 (9, 24)                                 | .162                 |
| Male, n (%)                                                                                      | 2514 (53.8)                   | 996 (52.9)                                 | .504                 |
| Small for gestational age, n (%)                                                                 | 424 (9.1)                     | 189 (10.0)                                 | .226                 |
| Need for ventilation by endotracheal tube at birth, n (%)                                        | 2331 (49.8)                   | 1156 (61.8)                                | <.001                |
| Extensive cardiopulmonary resuscitation (chest compression for >30 seconds ± epinephrine), n (%) | 266 (5.7)                     | 119 (6.4)                                  | .292                 |
| Respiratory distress syndrome, n (%)                                                             | 3962 (87.1)                   | 1554 (86.4)                                | .478                 |
| Surfactant administration, n (%)                                                                 | 3324 (71.0)                   | 1417 (75.0)                                | <.001                |
| Patent ductus arteriosus, n (%)                                                                  | 2586 (56.6)                   | 1014 (55.7)                                | .553                 |

<sup>a</sup>Group includes neonates excluded because of absence of cord clamping information or because they were not born in tertiary centers only. Does not include neonates excluded because they were moribund, on palliative care, or had major congenital anomalies.

<sup>b</sup>Significance was determined using Wilcoxon rank tests for continuous variables and Pearson's chi-square tests for categorical variables.

**Abbreviations:** GA, gestational age; IQR, interquartile range; SNAP-II, score for neonatal acute physiology-II
